# Supplementary material
Source: PubMed Central journal article supplement (PMC3989552)
Supplement: NIHMS558213-supplement-01.pdf [file NIHMS558213-supplement-01.pdf]

## **Supplementary Figure Legends**

**Supplementary Figure 1.** The relationship between BMI and the incidence of CR leaks. The rise in the incidence occurs around the median BMI of 28 kg/m<sup>2</sup>.

**Supplementary Figure 2.** The inverse relationship between the mean dose to the stomach and A) the incidence of in-field anastomosis or B) to three-field surgery.
